# Supplementary material for: Two cyanopyridinone-capped 9,9′-bifluorenylidene derivatives as non-fullerene acceptors for organic photovoltaic cells
Source: Royal Society of Chemistry journal article supplement (doi:10.1039/d1nj00540e), 2021-01-01
Supplement: d1nj00540e1.pdf [file d1nj00540e1.pdf]

## Supporting Information

### Two cyanopyridinone-capped 9,9'-bifluorenylidene derivatives as non-fullerene acceptors for organic photovoltaic cells

Chengjin Wei<sup>1,3</sup>, Tong Zhang<sup>1</sup>, Yuling Zhao<sup>2</sup>, Yang Zhou<sup>1</sup>, Hailin Ma<sup>1</sup>, Tianzhi Yu<sup>1,\*</sup>

<sup>1</sup>Key Laboratory of Opto-Electronic Technology and Intelligent Control (Ministry of Education), Lanzhou Jiaotong University, Lanzhou 730070, China

<sup>2</sup>School of Chemical and Biological Engineering, Lanzhou Jiaotong University, Lanzhou 730070, China

<sup>3</sup>Gansu Science & Technology Investment Corporation. Ltd., Lanzhou, 730050, China

## Contents

|                                                                      |    |
|----------------------------------------------------------------------|----|
| IR spectra of A1 and A2.....                                         | 1  |
| <sup>1</sup> H NMR and <sup>13</sup> C NMR spectra of compounds..... | 2  |
| Mass spectrometry data of A1 and A2 .....                            | 11 |

---

\* Corresponding Author.

Tianzhi Yu, E-mail: yutzh@mail.lzjtu.cn

## IR spectra of A1 and A2

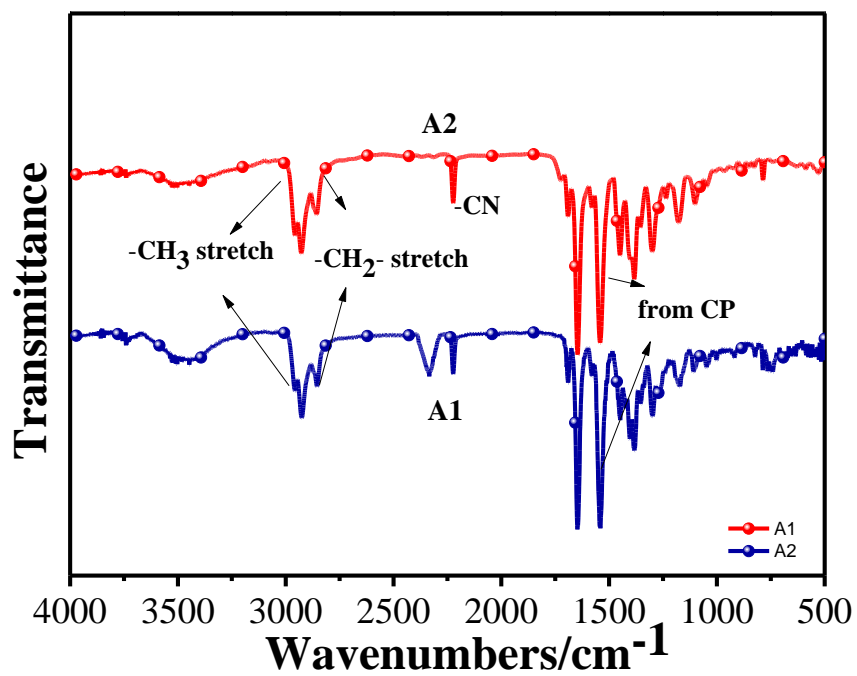

Fig. S1. IR spectra of A1 and A2.

# $^1\text{H}$ NMR and $^{13}\text{C}$ NMR spectra of compounds

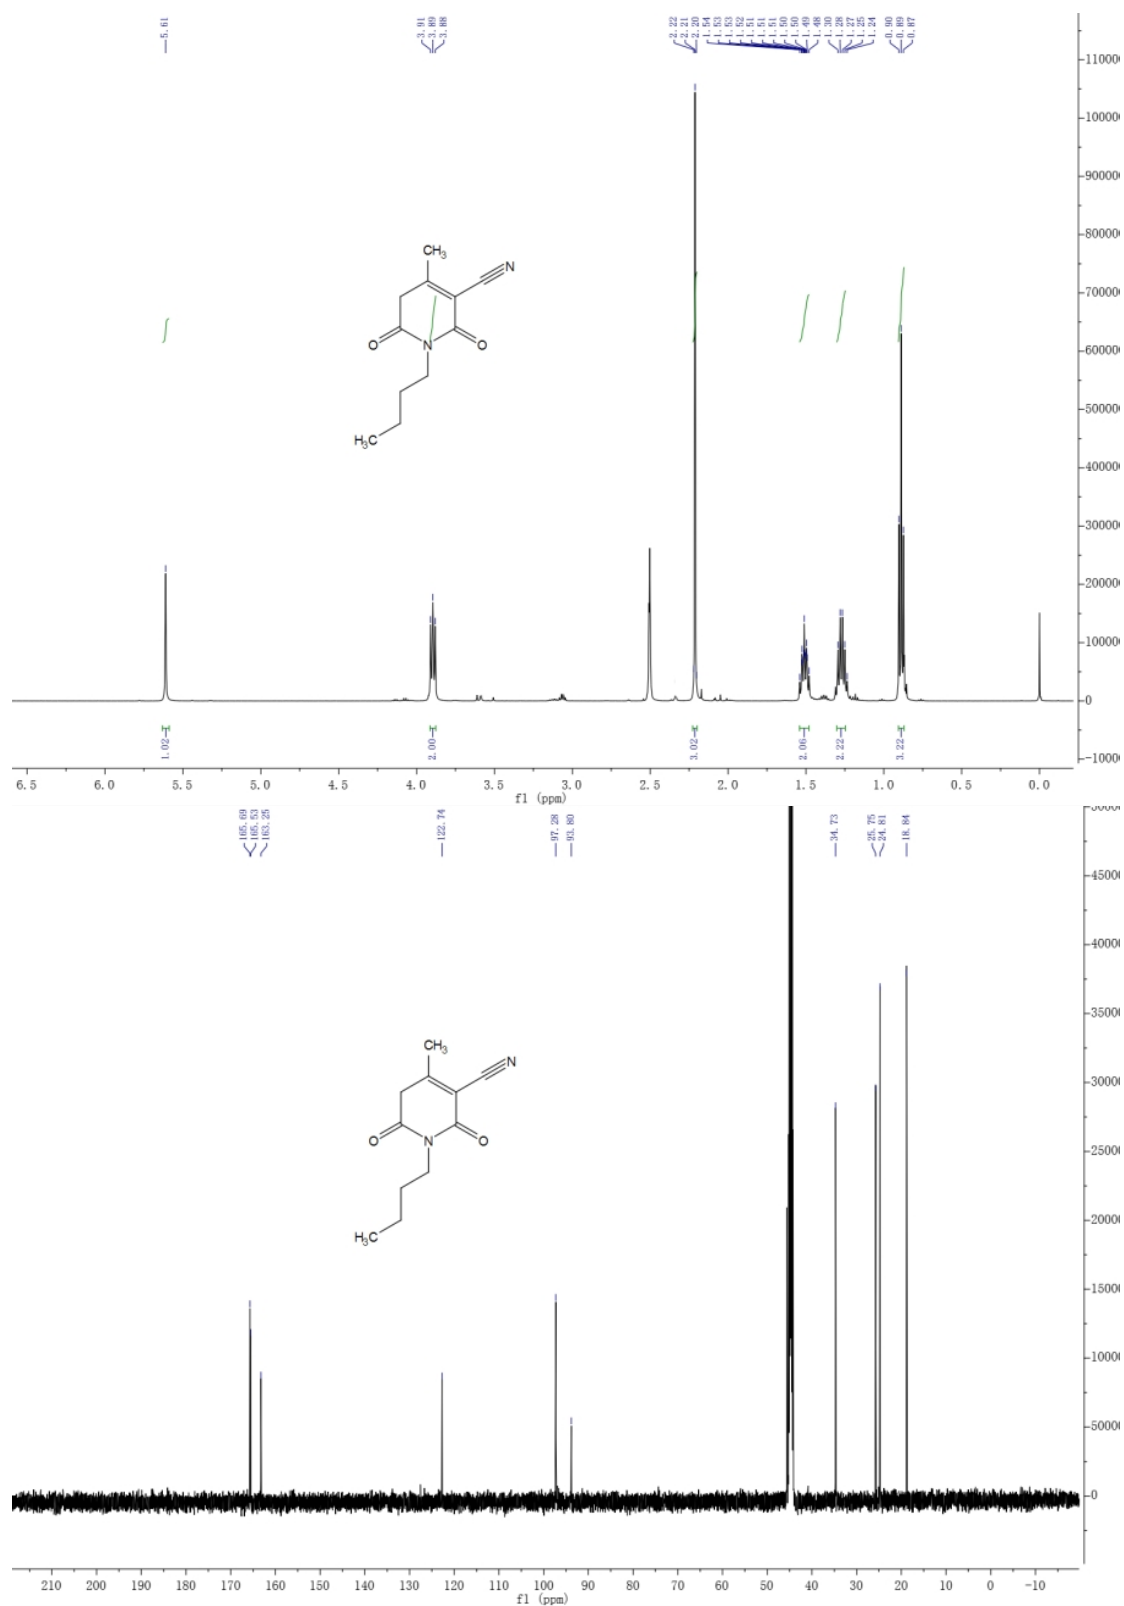

Fig. S2.  $^1\text{H}$  NMR and  $^{13}\text{C}$  NMR spectrum of the compound I

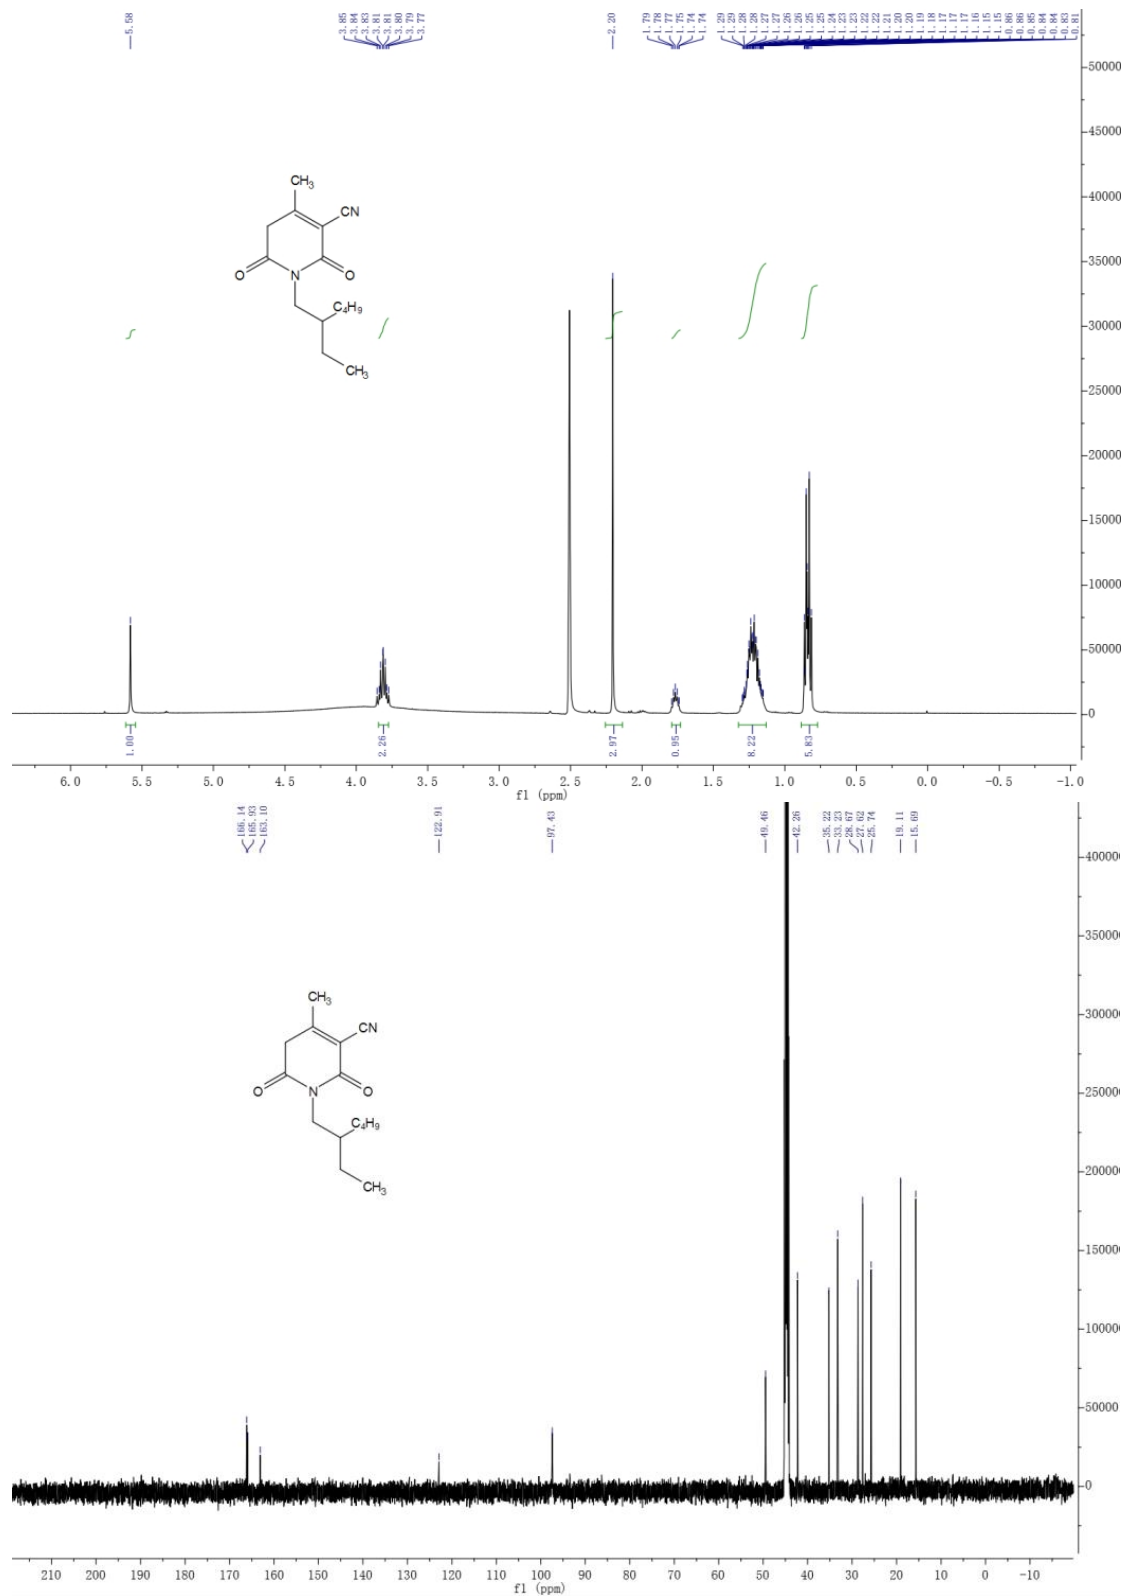

Fig. S3. <sup>1</sup>H NMR and <sup>13</sup>C NMR spectrum of the compound II

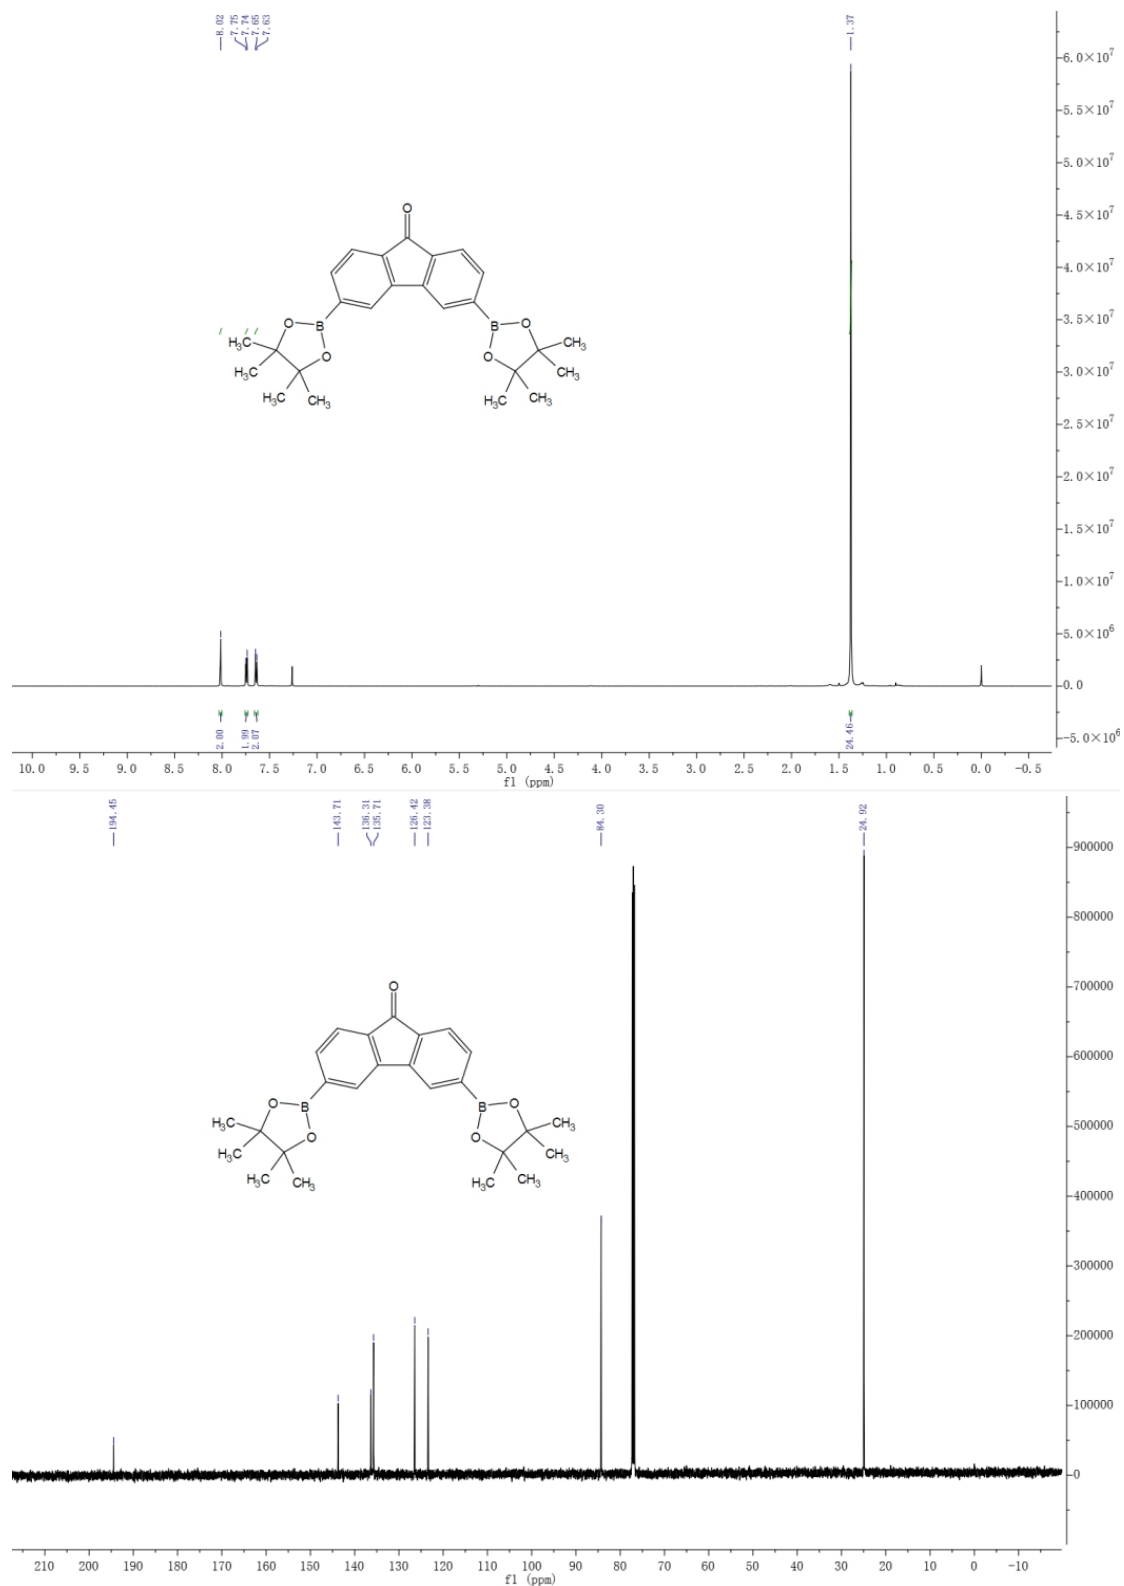

Fig. S4.  $^1\text{H}$  NMR and  $^{13}\text{C}$  NMR spectrum of the compound **III**

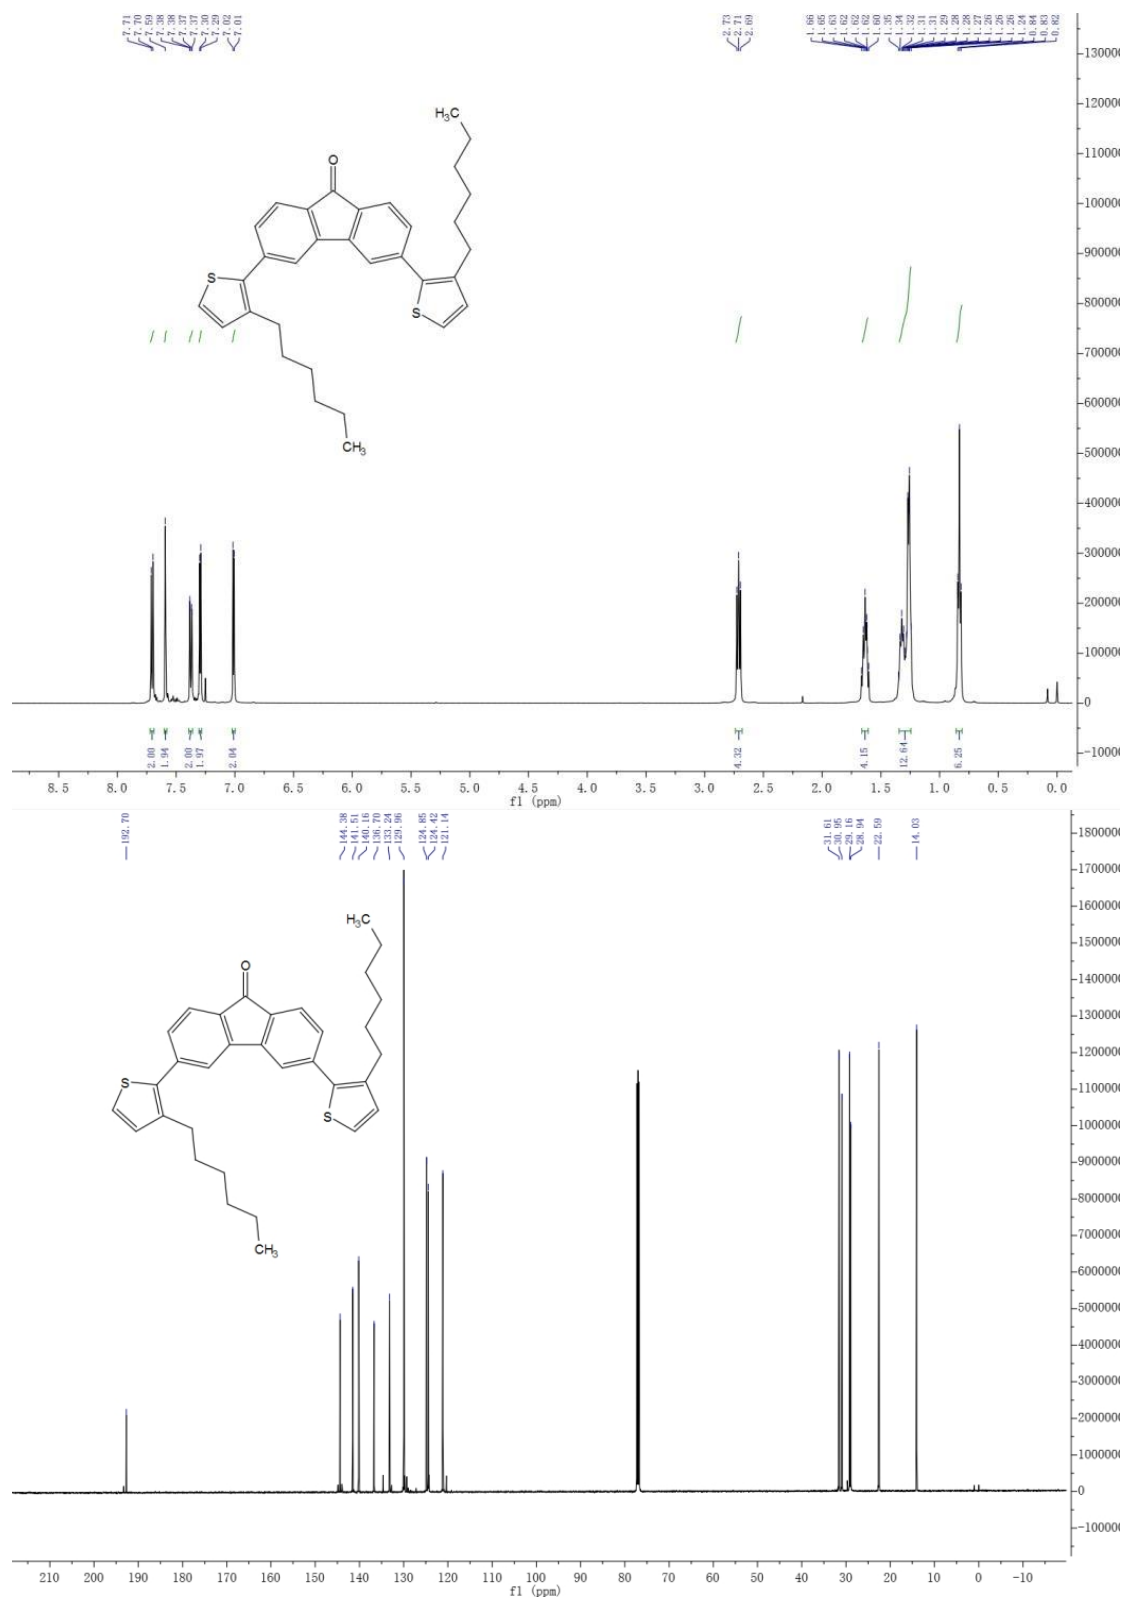

Fig. S5.  $^1\text{H}$  NMR and  $^{13}\text{C}$  NMR spectrum of the compound IV

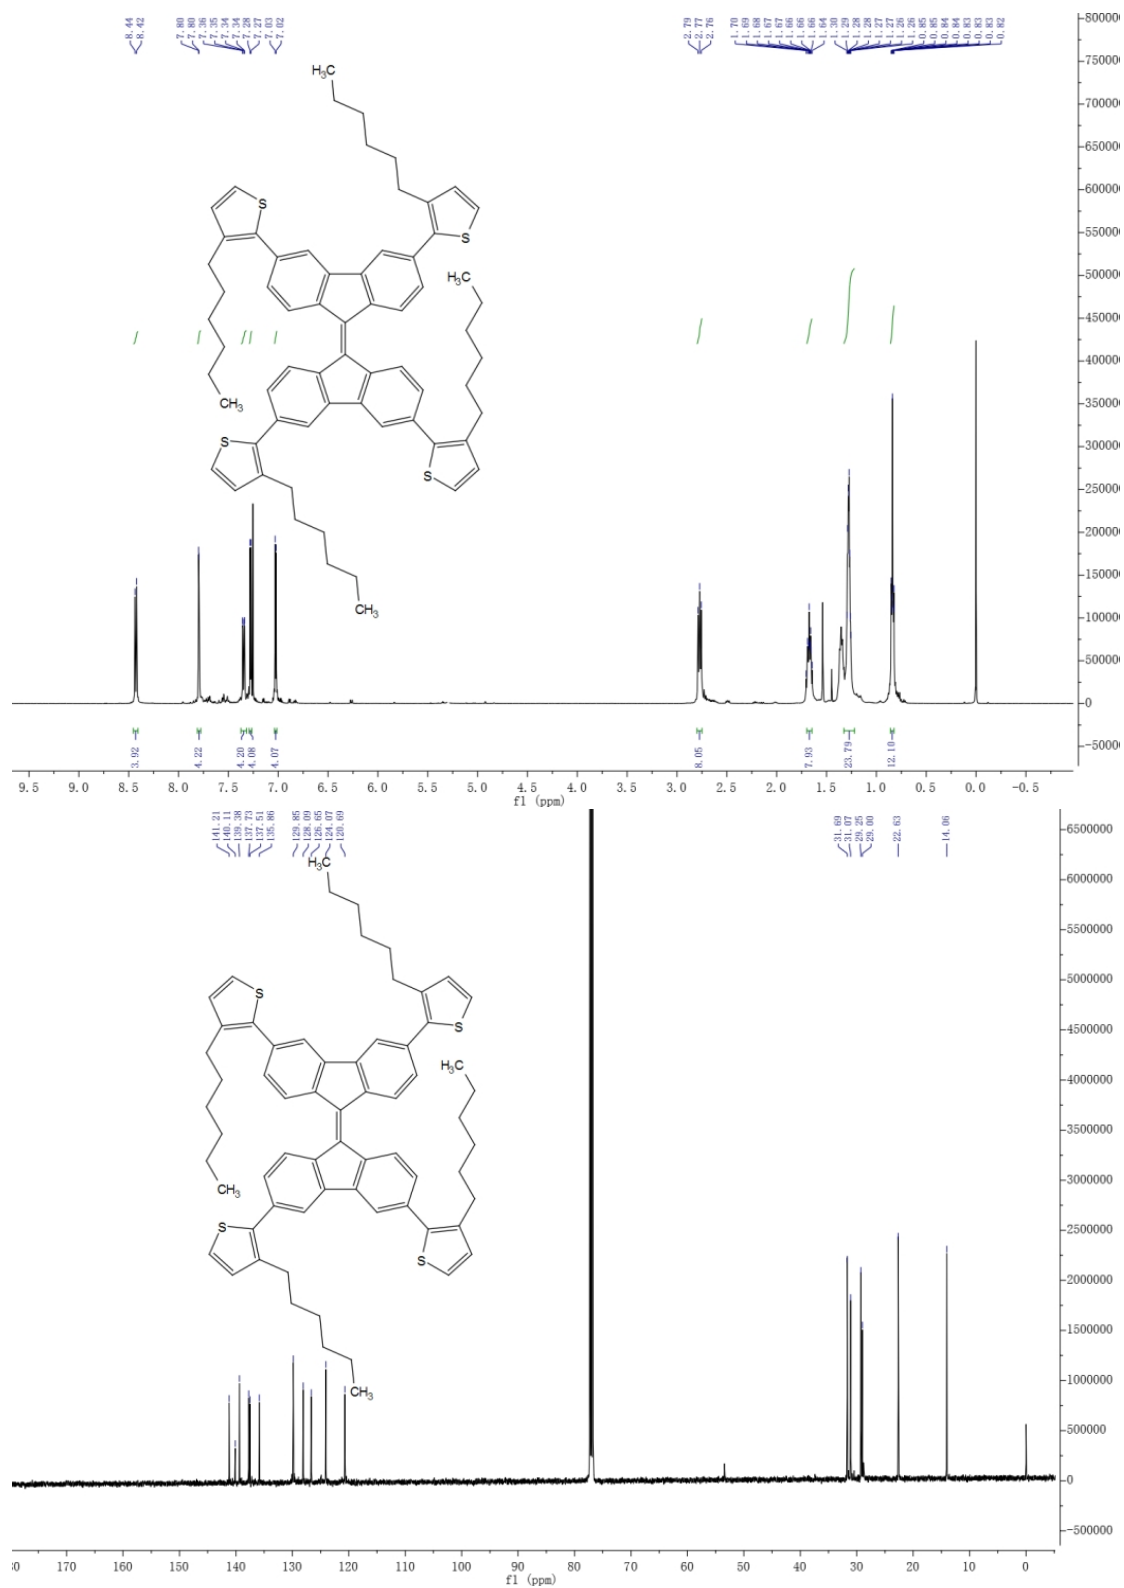

Fig. S6.  $^1\text{H}$  NMR and  $^{13}\text{C}$  NMR spectrum of the compound V

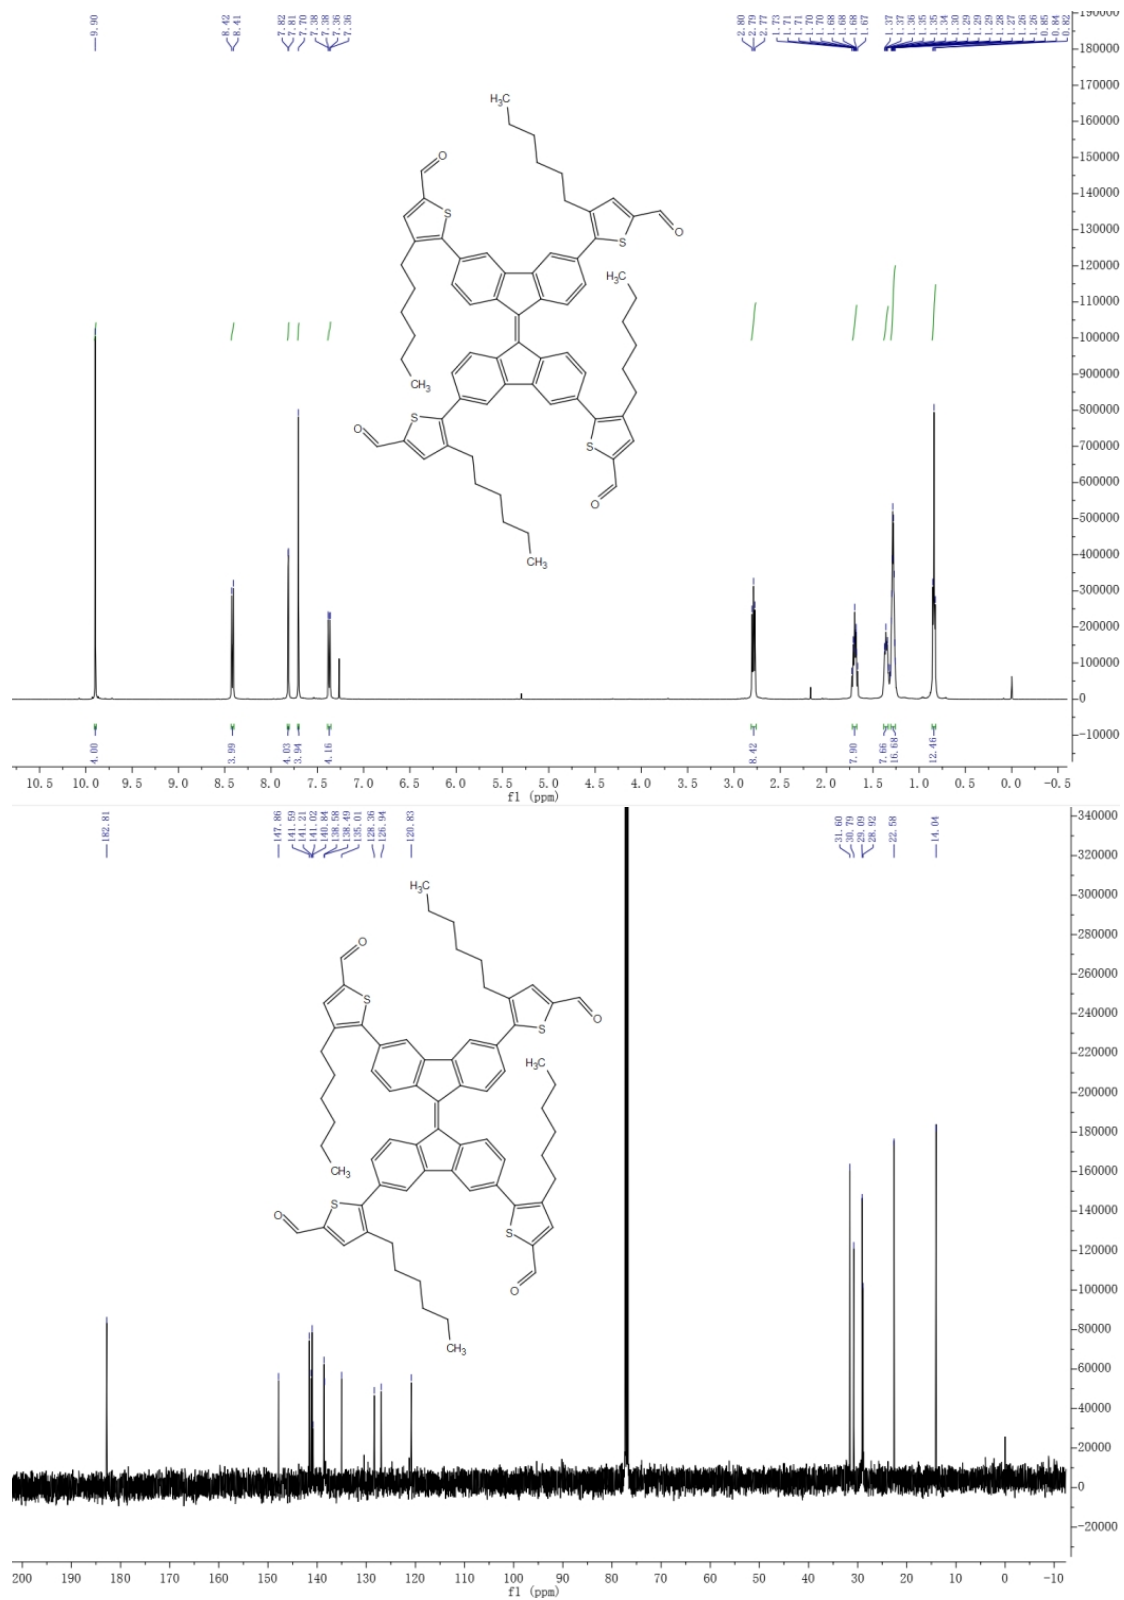

Fig. S7. <sup>1</sup>H NMR and <sup>13</sup>C NMR spectrum of the compound VI



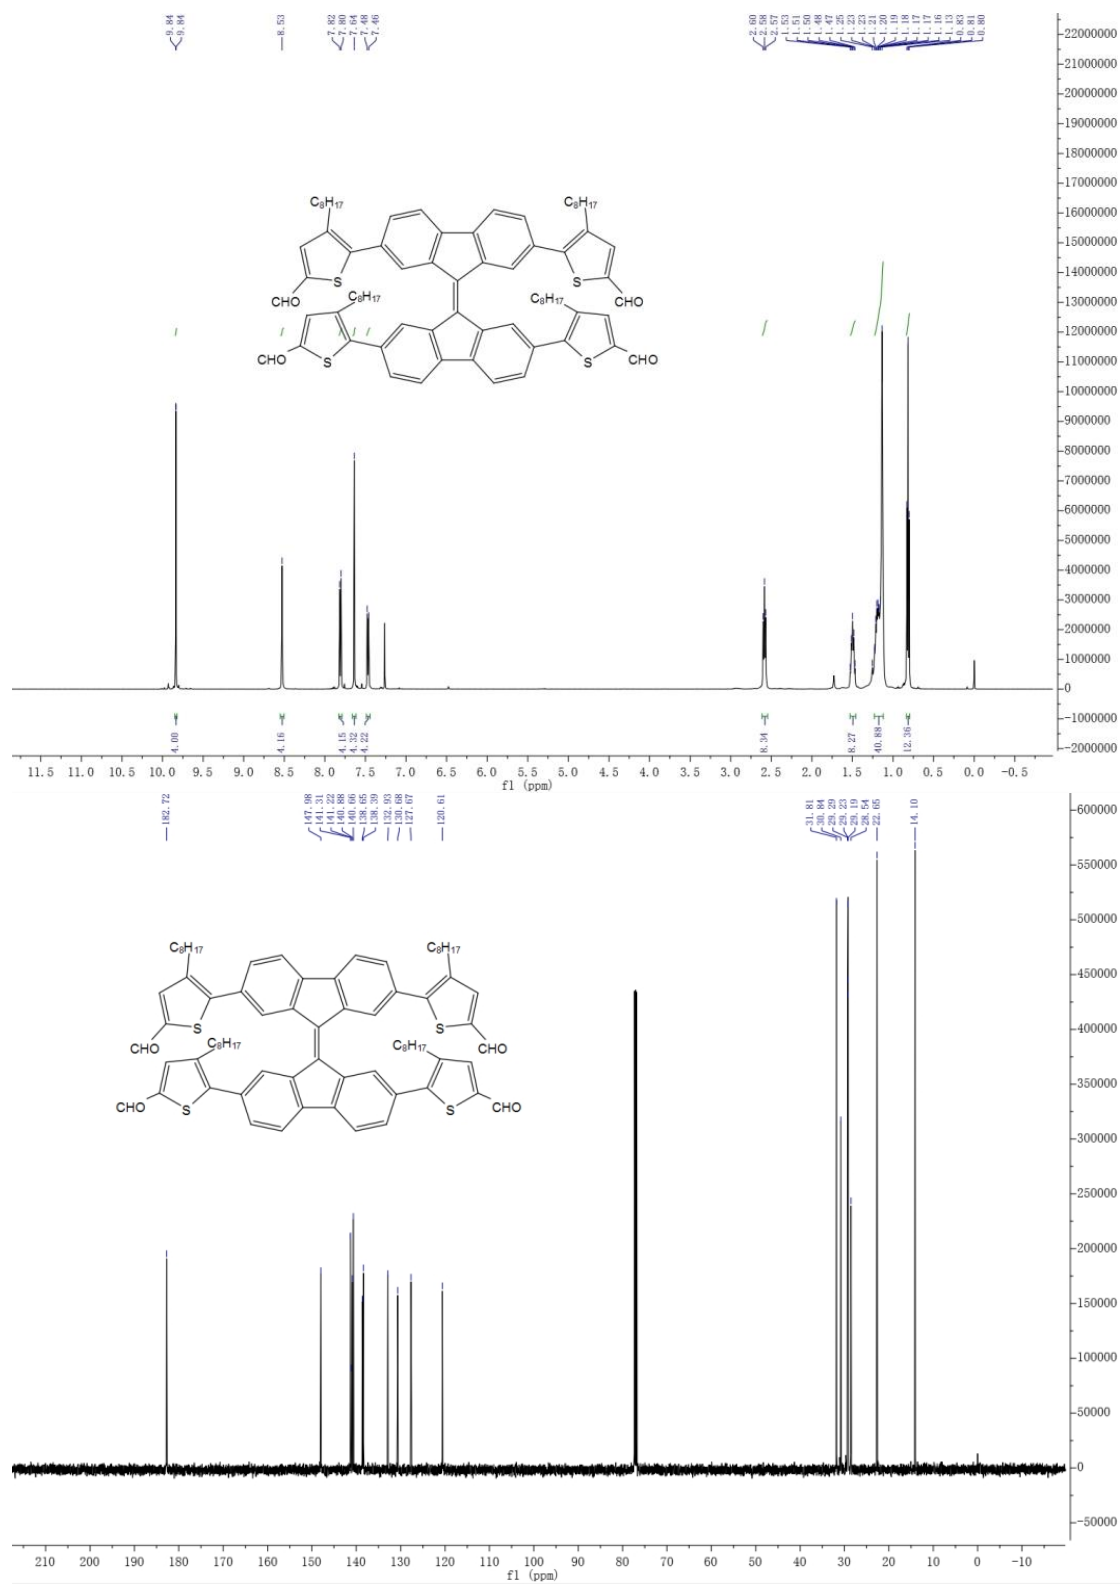

Fig. S8. <sup>1</sup>H NMR and <sup>13</sup>C NMR spectrum of the compound VII

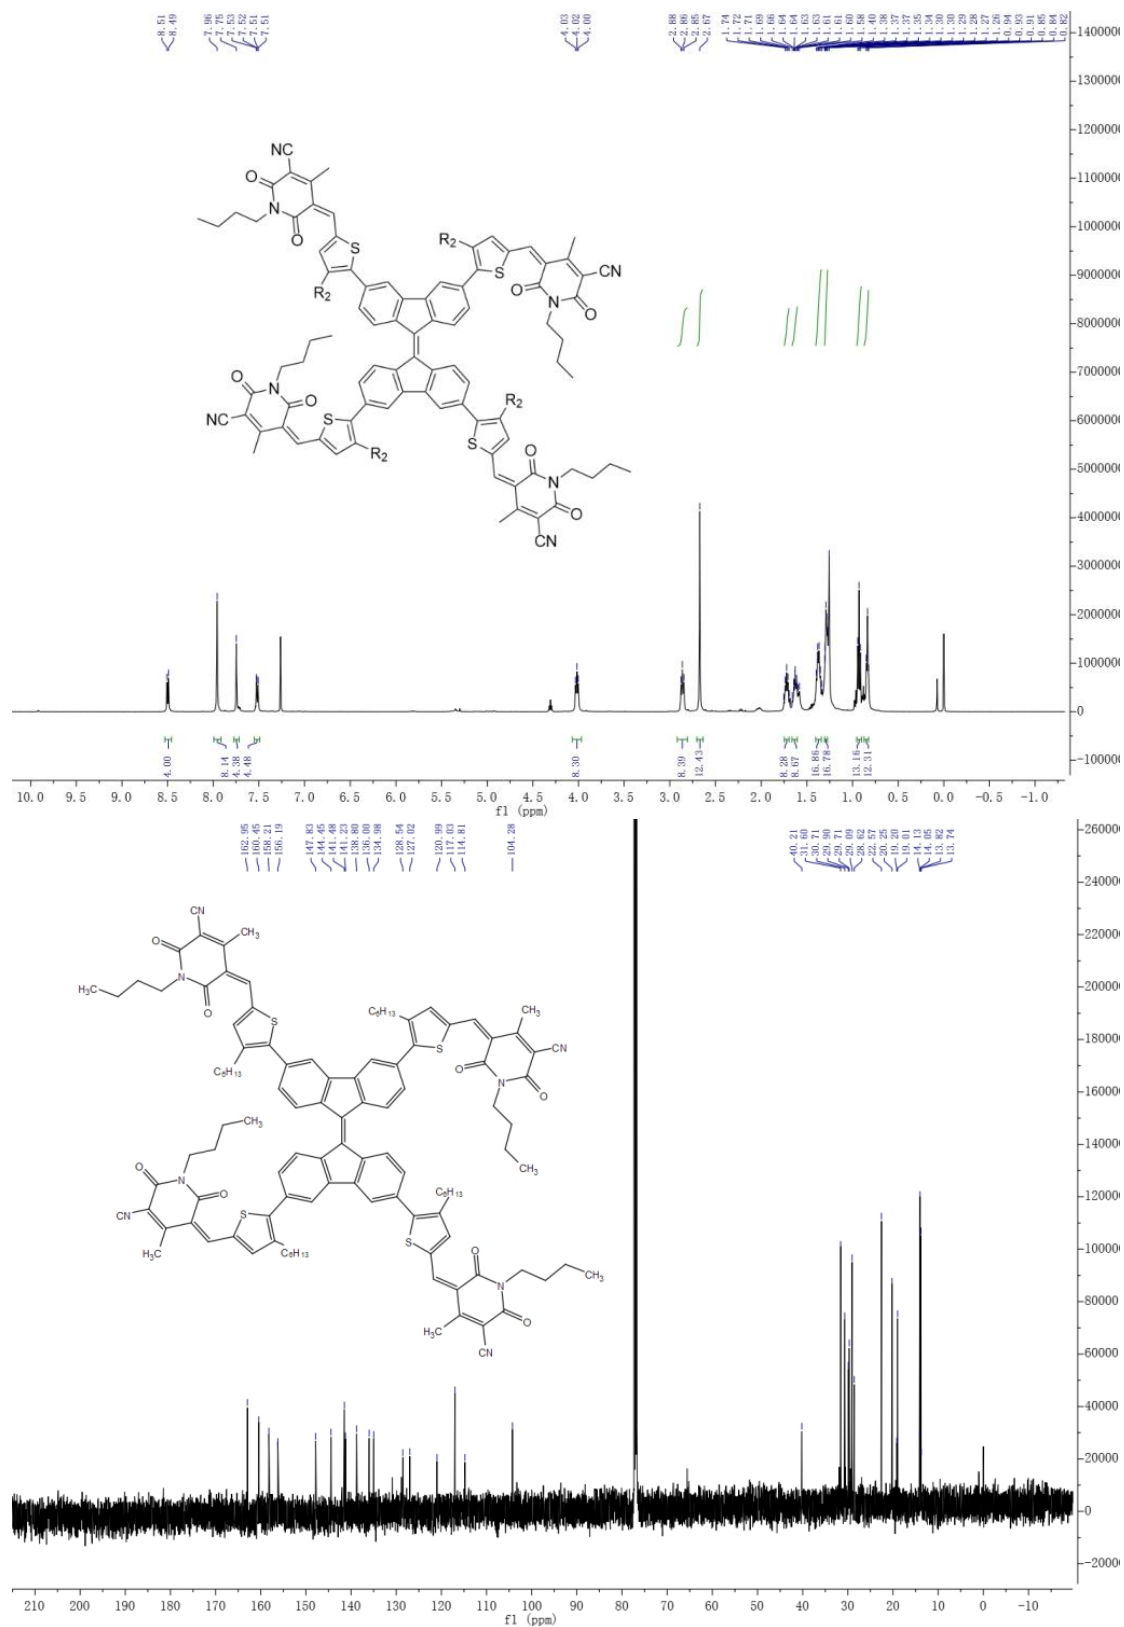

Fig. S9.  $^1\text{H}$  NMR and  $^{13}\text{C}$  NMR spectrum of the compound A1



## Mass spectrometry data of A1 and A2

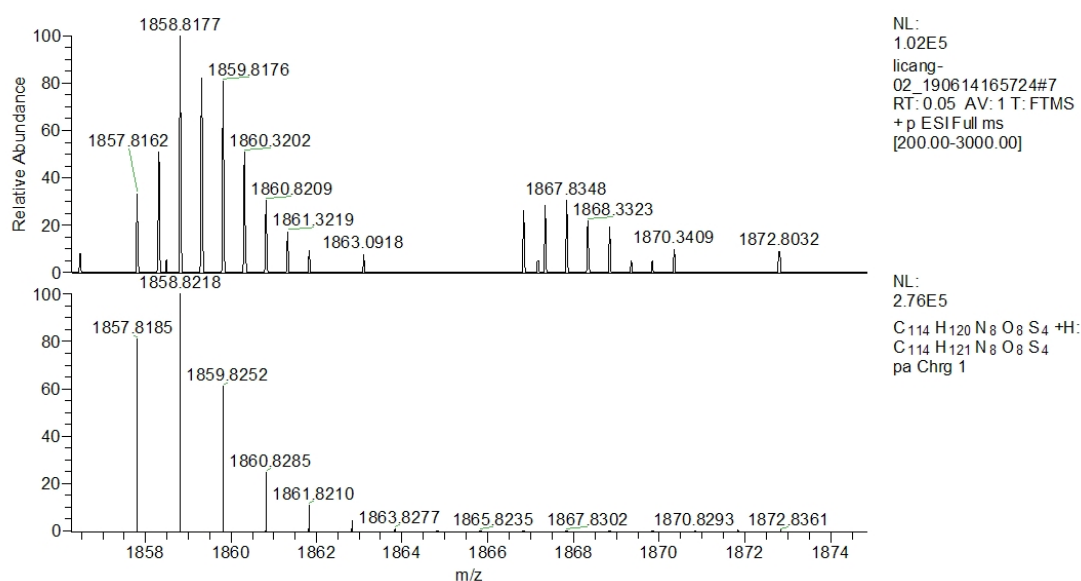

Fig. S11. Mass spectrometry data of A1

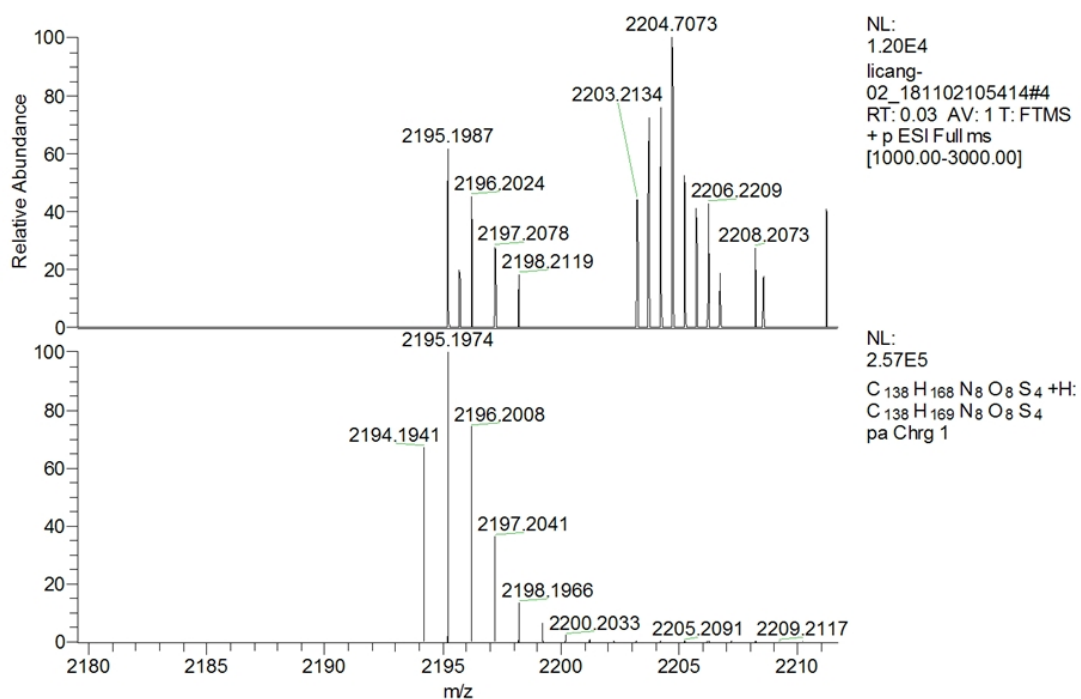

Fig. S12. Mass spectrometry data of A2
